# Supplementary material for: Prognostic value of computed tomography radiomics features in patients with gastric cancer following curative resection
Source: Springer Nature journal article supplement (doi:10.1007/s00330-018-5861-9), 2018-12-05
Supplement: MOESM1 [file 16316564]

# Supplementary

**contents**

[Supplementary 1](#_Toc519921068)

[Relationship between the radiomics features and clinicopathological risk factors 2](#_Toc519921070)

[Radiomics features 4](#_Toc519921071)

[1. SSF 4](#_Toc519921072)

[2. IIF 4](#_Toc519921073)

[3. TF 5](#_Toc519921074)

[Table 6](#_Toc519921075)

[Table S1 6](#_Toc519921076)

[Patient characteristics and clinicopathological variable in primary and validation cohorts 6](#_Toc519921077)

[Figure 9](#_Toc519921078)

[Figure S1 Recruitment criteria for patients 9](#_Toc519921079)

[Figure S2 Kaplan-Meier survival analysis in different subgroup in the validation cohort 11](#_Toc519921080)

[Figure S3 Relationship between the radiomics features and clinicopathological risk factors 13](#_Toc519921081)

## Relationship between the radiomics features and clinicopathological risk factors.

These potential associations between radiomics features and clinicopathological characteristics were analyzed using Spearman correlation test (Figure S3). We found that four radiomics prognostic feature—CF_Sphericity, WLH_IIF_skewness, WHL_GLRLM_LRHGLE and WHH_GLRLM_energy—were weakly correlated with at least one clinicopathological characteristics, including differentiation, tumor size, N stage, TNM stage and neural invasion (Spearman’s rho coefficient, 0.26 to 0.38; *P*<0.05). Additionally, a negative correlation was found between WHH_IIF_mean and N stage, TNM stage (Spearman’s rho coefficient, -0.25 and -0.28, respectively; *P*<0.05). However, there were no significant association between WHH_GLCM_IMC2 and any clinicopathological characteristics.

## Radiomics features

We divided 273 radiomics features into four groups [2]: (1) Shape size based features (SSF); (2) Image intensity features (IIF); (3) Textural features (TF); (4) Wavelet features (WF). The radiomics features selected for R-signature were defined as follows:

### 1. SSF


Where S is an area of the region and C is the circumference of the region.

### 2. IIF

Intensity features are extracted from the histogram of the tumor region, and describe the distribution of voxel intensities within the CT image. X represents the image matrix with N voxels as the total. P represents the histogram with N**l** discrete intensity levels. The definitions of the intensity features are as follows:


Where is the mean of X. This feature represents asymmetry and deviation from a normal distribution. Skewness>0: right skewed, most values concentrated on the left of the mean; Skewness<0: left skewed, most values concentrated on the right of the mean; Skewness = 0: symmetrical distribution around the mean

### 3. TF

Textural features are extracted based on two matrices: the gray-level co-occurrence matrix (GLCM), gray-level run-length matrix (GLRLM).

#### 3.1 Gray-level co-occurrence matrix (GLCM)

Here, we use P(i,j;,) to represent the GLCM matrix, the size of which is NN, where N represents the number of discrete grey-level intensities, the (i,j)th element represents the number of times that intensity levels i and j occur adjacently in the image, and the distance between them is in direction . The following specific features are derived from the GLCM:

| **Preliminary Definitions:** |
| --- |
| P(i,j) is the co-occurrence matrix for an arbitrary δ and α |
| Ng is the number of discrete intensity levels in the image |
| μ is the mean of P(i,j) |
| depicts the marginal row probabilities |
| depicts the marginal column probabilities |
|  |
|  |

1. Information measure of correlation 2(IMC2)

#### 3.2 Gray-level run-length matrix (GLRLM)

The gray level run-length represents a series of consecutive pixels with the same gray-level value. P(i,j|) is used to represent the gray level run-length matrix, where the (i,j)th element describes gray-level i which consecutively appears j times in the ROI in the direction.

| Preliminary Definitions: |
| --- |
| ρ(i,j|θ) is the (i,j)th entry in the given run-length matrix ρ for a direction θ |
| Ng is the number of discrete intensity values in the image |
| Nr is the number of different run lengths |
| depicts the marginal row probabilities |

1. Long Run High Gray Level Emphasis(LRHGLE)

This feature measures the joint distribution of long runs and high gray level values. The LRHGE is expected large for images with many long runs and high gray level values.

This feature reflects the homogeneity of the gray-level distribution, the small value means the strong homogeneity.

## Table

## Table S1 Patient characteristics and clinicopathological variable in primary and validation cohorts

| Characteristic | Primary cohort  *N*=115 | Validation cohort  *N*=66 | *P*-value |
| --- | --- | --- | --- |
| Age (years)* | 61.9 (58.5±12.3) | 65 (60.3±10.2) | 0.2 a |
| Gender |  |  | 0.62 |
| Male | 80 (70) | 43 (65) |  |
| Female | 35 (30) | 23 (35) |  |
| Tumor size |  |  | 0.28 |
| < 5cm | 54 (47) | 37 (56) |  |
| ≧5cm | 61 (53) | 29 (44) |  |
| Tumor localization |  |  | 0.379 b |
| Proximal | 12 (10) | 3 (5) |  |
| Middle | 24 (21) | 14 (21) |  |
| Distal | 79 (69) | 49 (74) |  |
| Differentiation |  |  | 0.48 |
| Well + moderate | 27 (23) | 19 (29) |  |
| Poor + undifferentiated | 88 (77) | 47 (71) |  |
| Type of Surgery |  |  | 1 |
| Subtotal gastrectomy | 97 (84) | 56 (85) |  |
| Total gastrectomy | 18 (16) | 10 (15) |  |
| T stage |  |  | 0.805 |
| T2 | 7 (6) | 3 (5) |  |
| T3 | 21 (18) | 10 (15) |  |
| T4a | 87 (76) | 53 (80) |  |
| N stage |  |  | 0.842 b |
| N0 | 37 (32) | 20 (30) |  |
| N1 | 19 (17) | 8 (12) |  |
| N2 | 22 (19) | 16 (25) |  |
| N3a | 26 (22) | 14 (21) |  |
| N3b | 11 (10) | 8 (12) |  |
| TNM stage |  |  | 0.851 |
| Ⅰ | 5 (4) | 3 (5) |  |
| Ⅱ | 33 (29) | 16 (24) |  |
| Ⅲ | 77 (67) | 47 (71) |  |
| Lymphovascular invasion |  |  | 0.541 |
| Negative | 52 (45) | 33 (50) |  |
| Positive | 63 (55) | 33 (50) |  |
| Neural invasion |  |  | 0.64 |
| Negative | 67(58) | 41(62) |  |
| Positive | 48(42) | 25(38) |  |
| Adjuvant chemotherapy |  |  | 0.435 |
| No | 46(40) | 31(47) |  |
| Yes | 69(60) | 35(53) |  |

Values in parentheses are percentages unless indicated otherwise; *values are median(range).

aP-value derived from Wilcoxon rank sum test with continuity correction; bP-value derived from Pearson's Chi-squared test; the other *P*-value derived from Fisher's exact test.

## Figure

## Figure S1 Recruitment criteria for patients

**
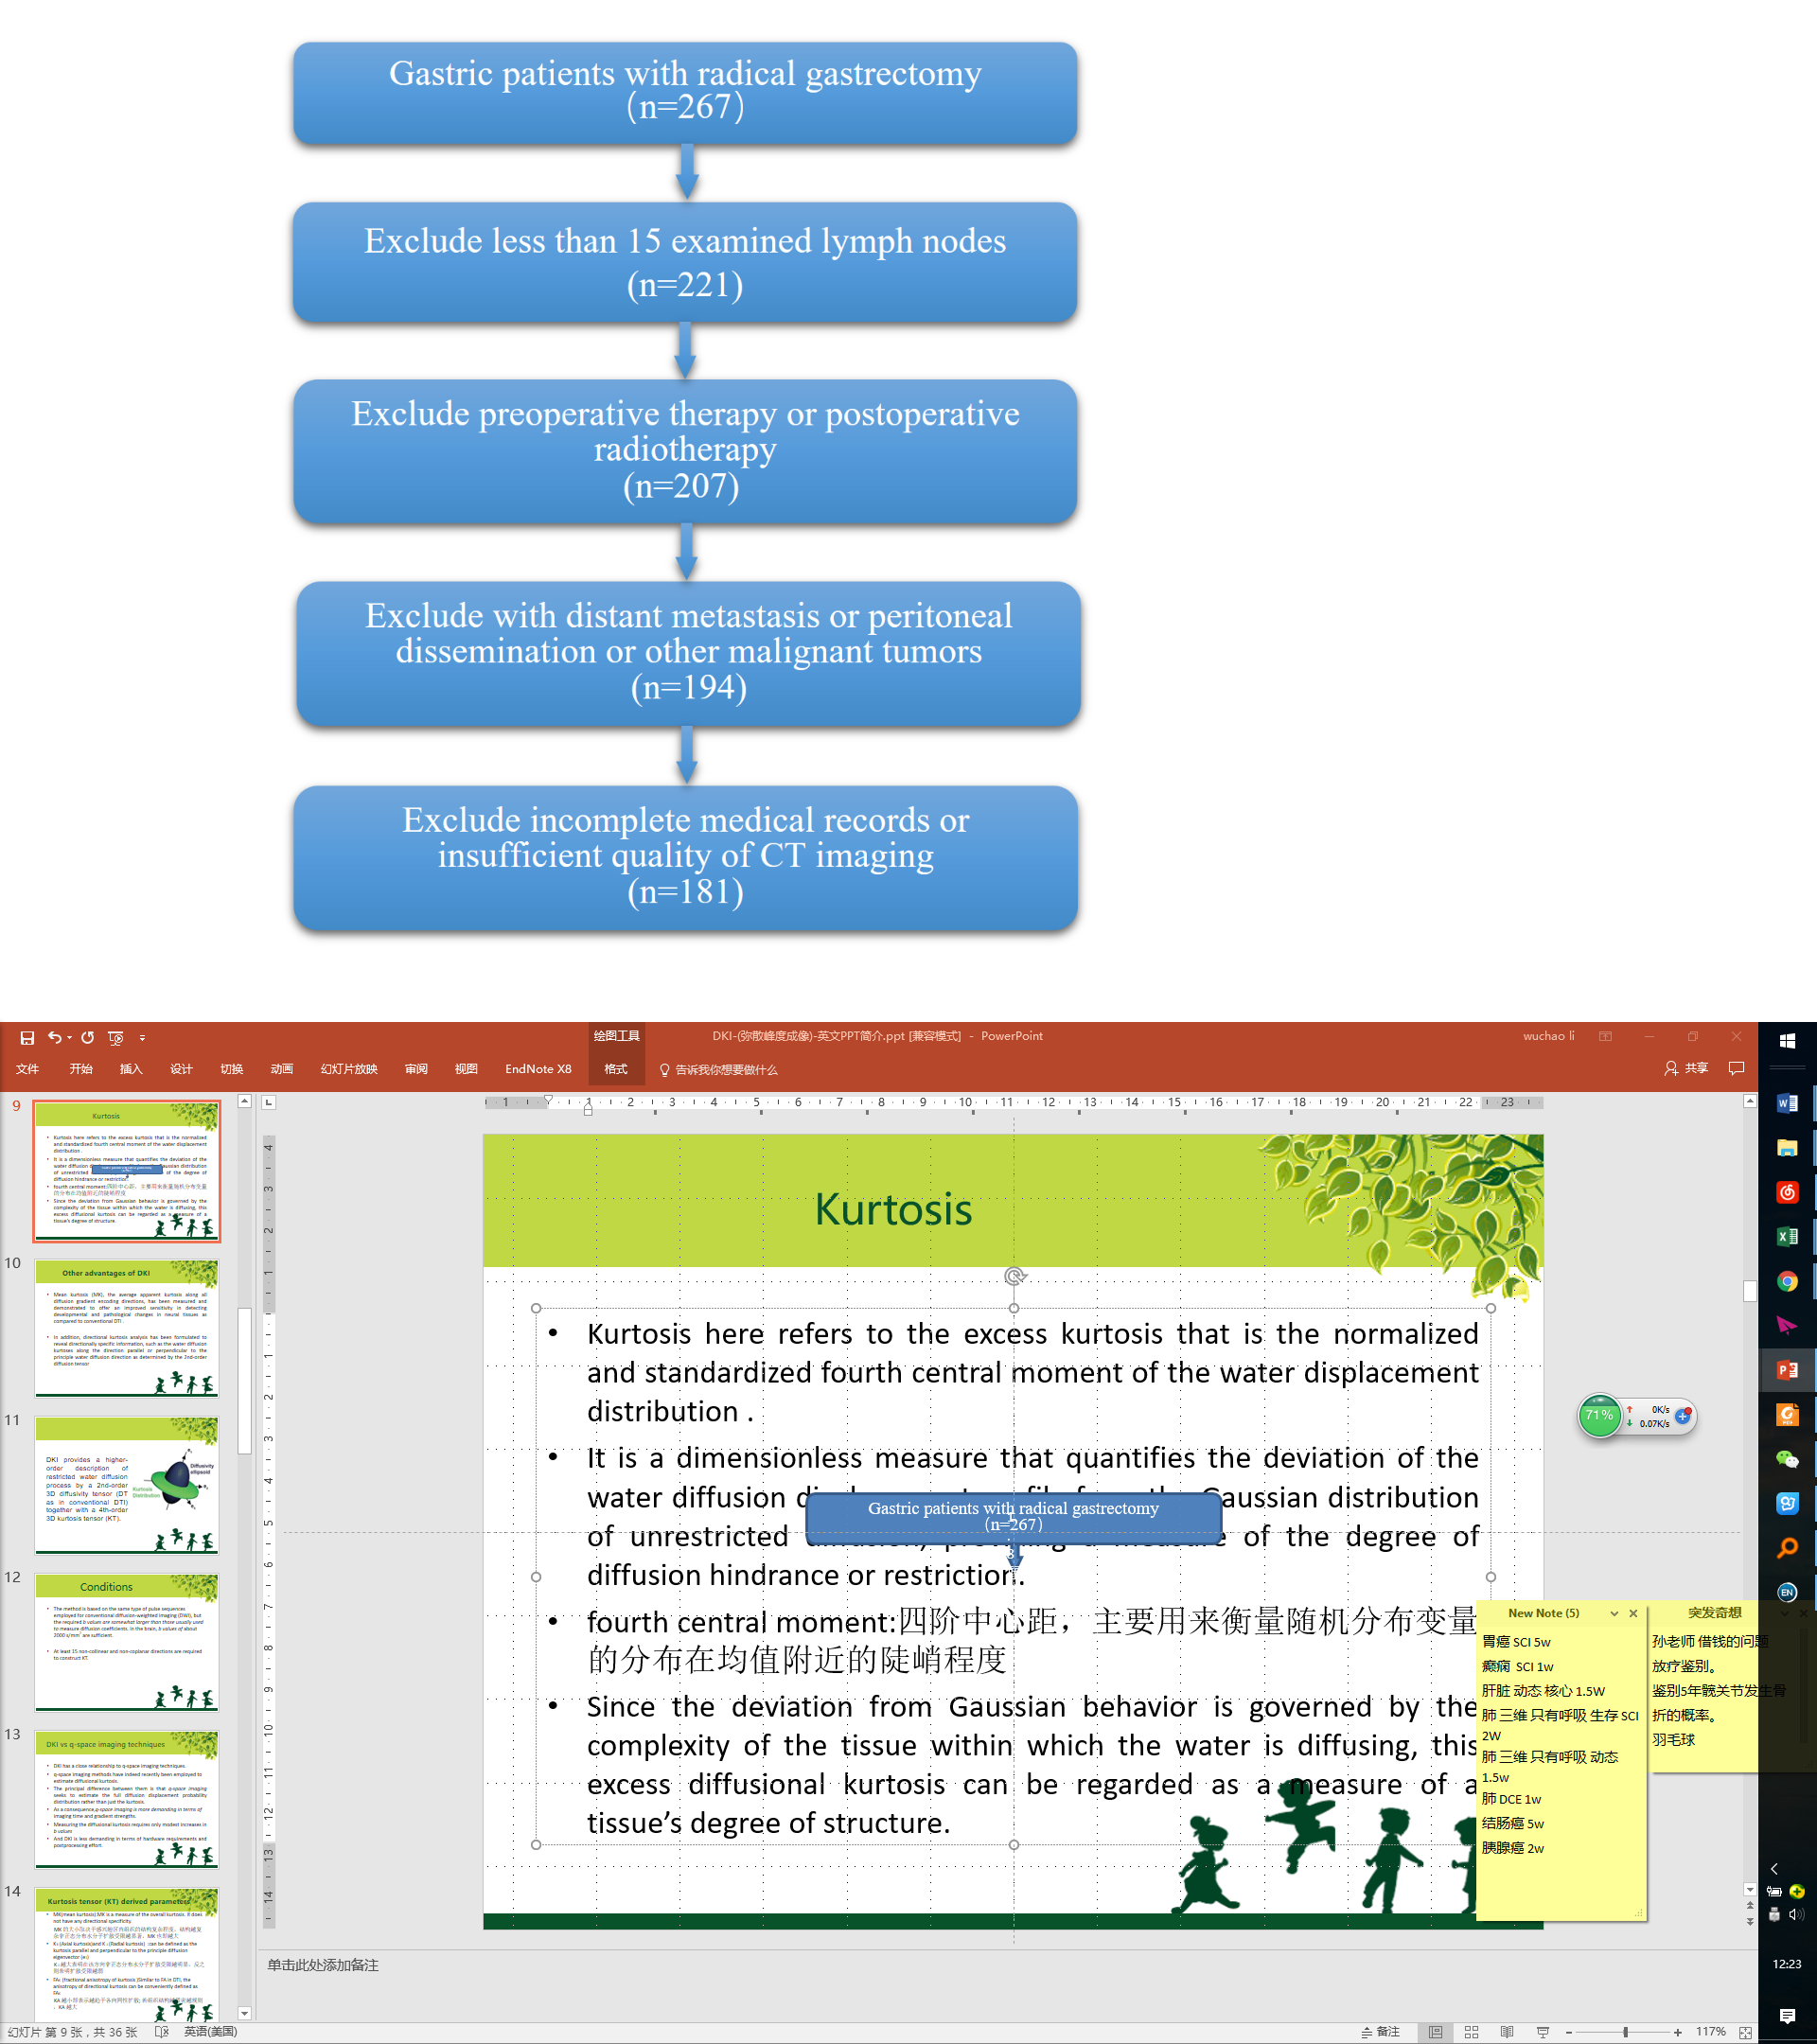
**

Figure S1 Recruitment criteria for patients

## Figure S2 Kaplan-Meier survival analysis in different subgroup in the validation cohort


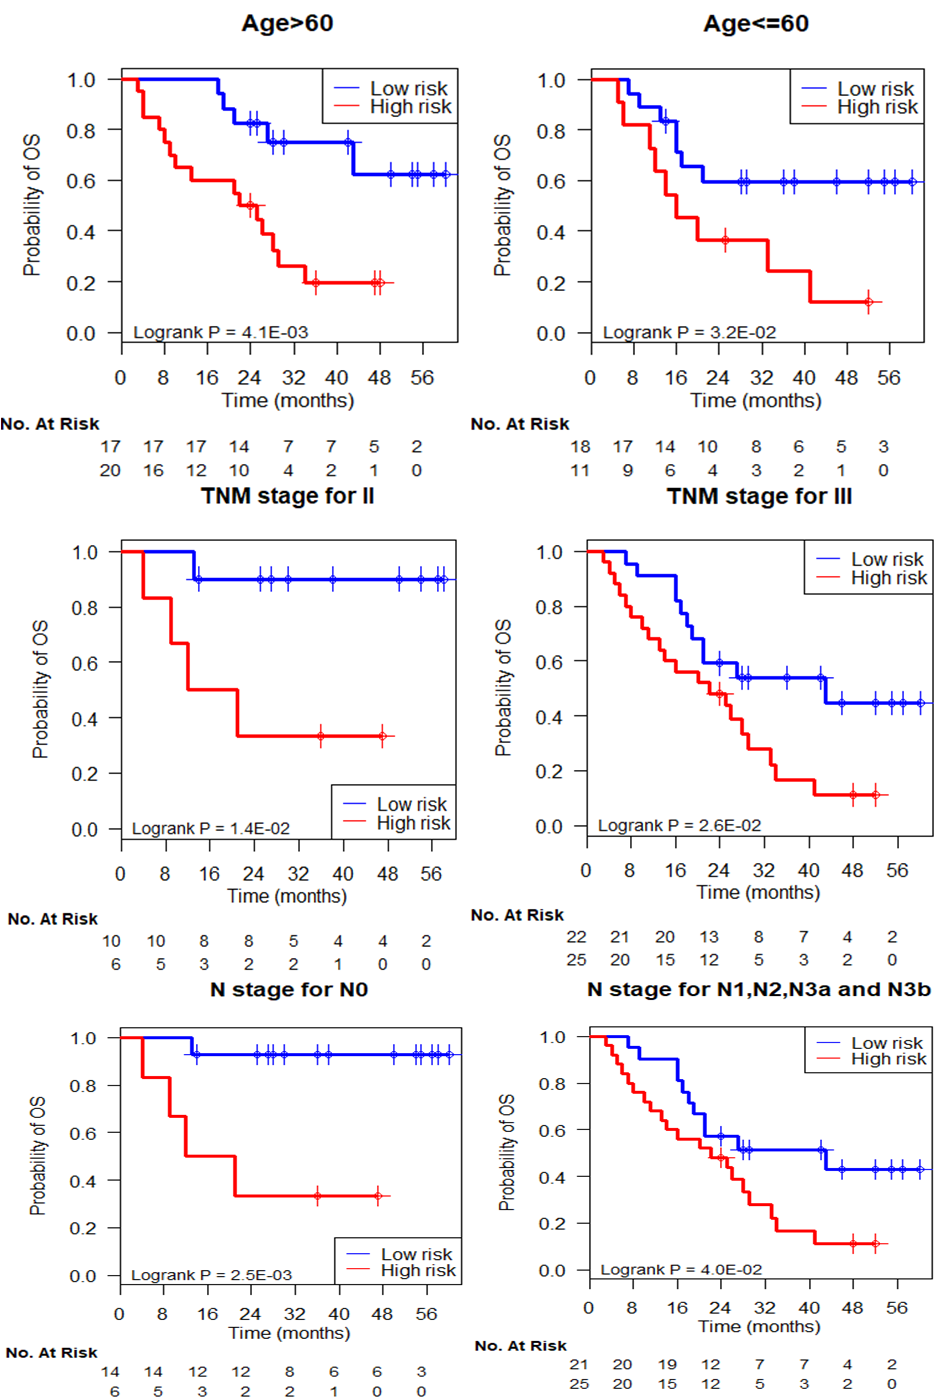


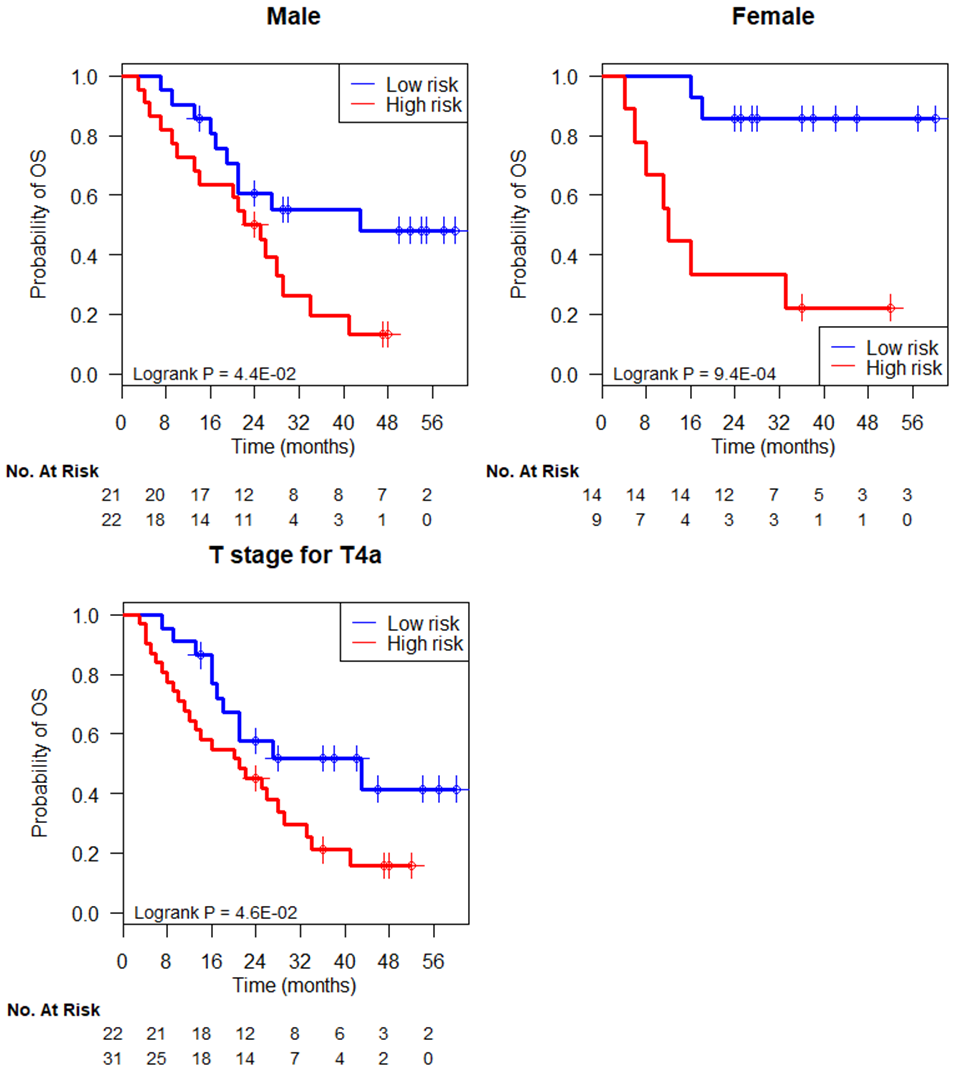


**Figure S2 Kaplan-Meier survival analysis in different subgroup in the validation cohort.** Kaplan-Meier survival analysis in different subgroup in the validation cohort according to the model based on R-signature as shown in Figure S2. In our study, we found that the Age for 60 years was a meaningful cutoff. Due to the sample size, we failed to analysis the subgroup in T stage of T2 and T3.

## Figure S3 Relationship between the radiomics features and clinicopathological risk factors


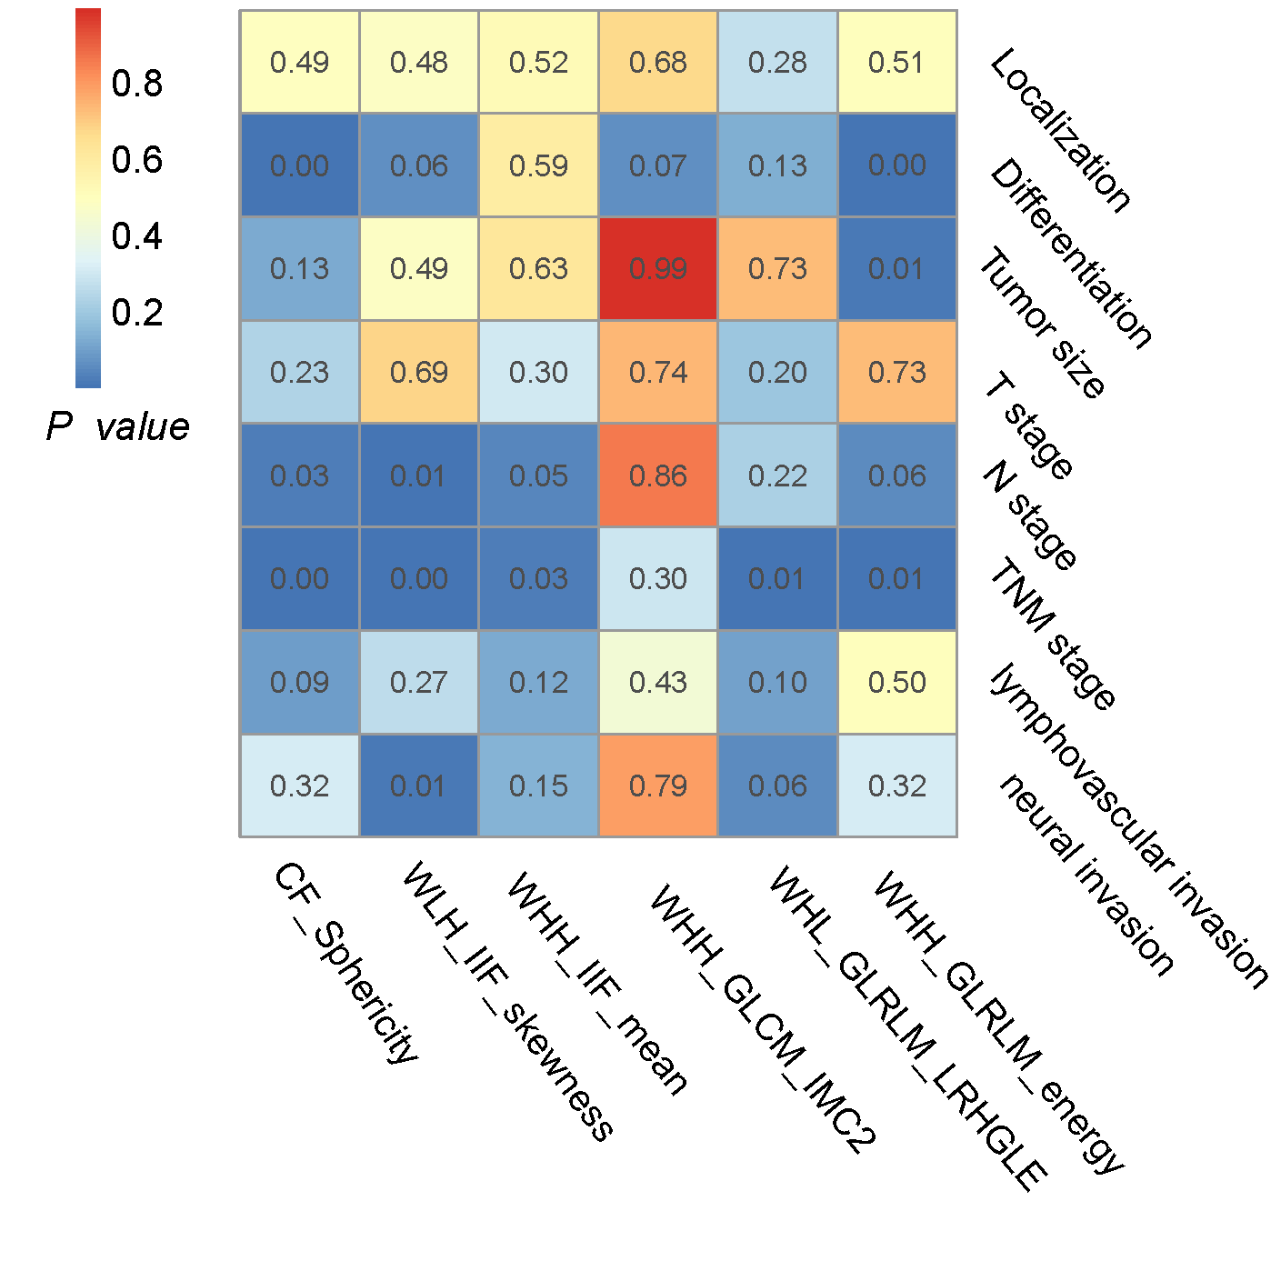


**Figure S3** **Relationship between the radiomics features and clinicopathological risk factors.** Potential relationship between the radiomics features and clinicopathological risk factors Potential relationship between the radiomics features and clinicopathological risk factors selected for the survival model for prediction of OS. *P* value less than 0.05 indicates the potential association with Spearman rank correlation.

**Reference:**

1. Tibshirani R (1996) Regression Selection and Shrinkage via the Lasso. J R Stat Soc B. 58:267-288.
2. Aerts HJ, Velazquez ER, Leijenaar RT et al (2014) Decoding tumour phenotype by noninvasive imaging using a quantitative radiomics approach. Nat Commun 5:4006
